# Supplementary material for: Versatile lanthanide coordination assemblies due to the synergistic effect of lanthanide contraction and flexibility of a flexible tricarboxylate ligand
Source: Royal Society of Chemistry journal article supplement (doi:10.1039/b708104a), 2007-01-01
Supplement: b708104a.pdf [file b708104a.pdf]

**Supporting Information for the paper titled “Versatile lanthanide coordination assemblies due to the synergistic effect of lanthanide contraction and flexibility of the a novel tripodal ligand” to *CrystEngComm*.**

**Su-na Wang<sup>[a]</sup>, Ran Sun<sup>[a]</sup>, Xiao-shi Wang<sup>[a]</sup>, Yi-zhi Li<sup>[a]</sup>, Yi Pan<sup>[a]</sup>, Junfeng Bai<sup>\*[a,c]</sup>, Manfred Scheer<sup>[b]</sup> and Xiao-zeng You<sup>[a]</sup>**

[a] The State Key Laboratory of Coordination Chemistry & School of Chemistry and Chemical Engineering, Nanjing University, Nanjing 210093, P.R. China. E-mail address: [bjunfeng@nju.edu.cn](mailto:bjunfeng@nju.edu.cn)

[b] Institut für Anorganische Chemie der Universität Regensburg, 93040 Regensburg, Germany.

[c] State Key Lab of Rare Earth Materials Chemistry and Applications, Beijing 100871, China

**Figure S1.** Perspective view of **1·Ce** along the *b* axis, showing  $\pi$ --- $\pi$  stacking interactions. The solvent molecules are omitted for clarity.

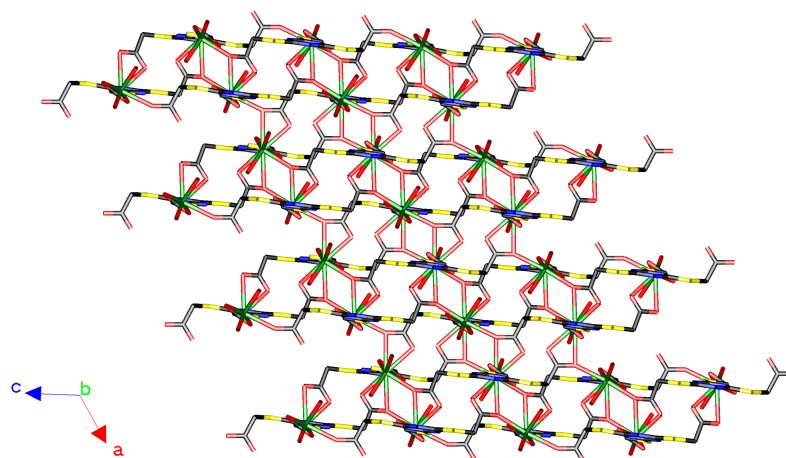

**Figure S2.** Perspective view of **4·Sm** along the *c* axis, showing hydrogen bonding interactions. Except the hydrogen atoms in the hydrogen bonds, other hydrogen atoms are omitted for clarity.

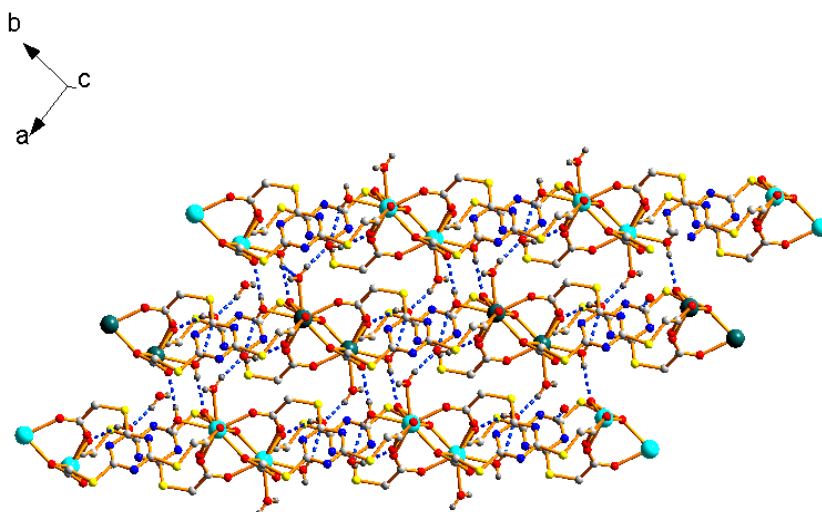

**Figure S3.** Perspective of **4·Sm**, showing the space filling of solvent molecules in one-dimensional channels along the *a* axis.

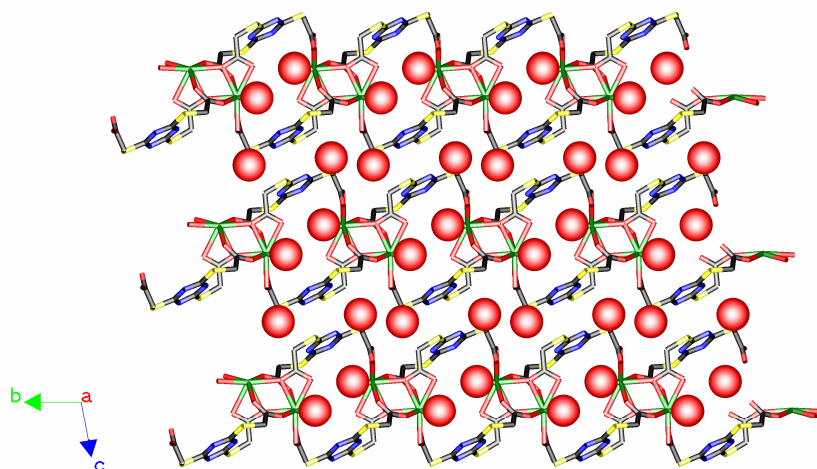

**Figure S4.** Perspective of **7·Dy**, showing S...S interactions between the dimers.

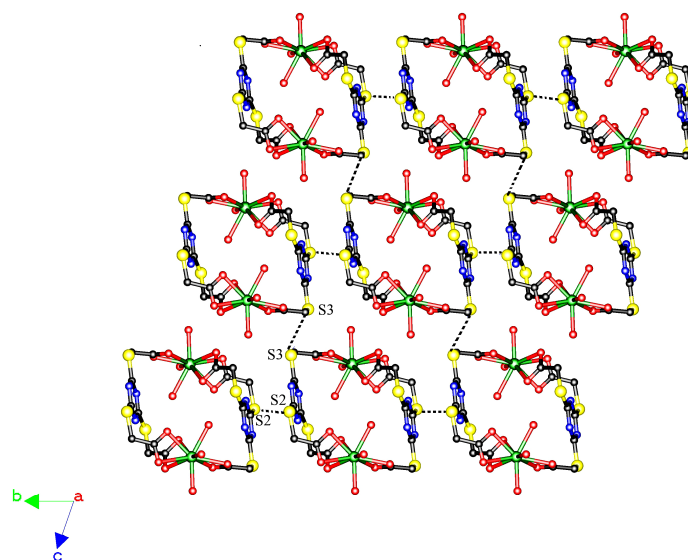

**Figure S5.** Perspective of **7·Dy**, showing the space filling of solvent molecules in one-dimensional channels along the *a* axis.

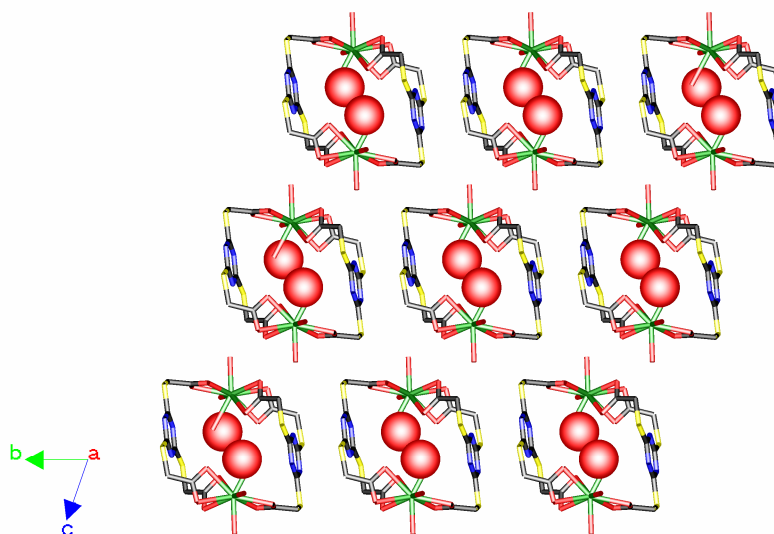

**Figure S6.** TGA curve of **2·Pr** (a), **4·Sm** (b), **7·Dy** (c).

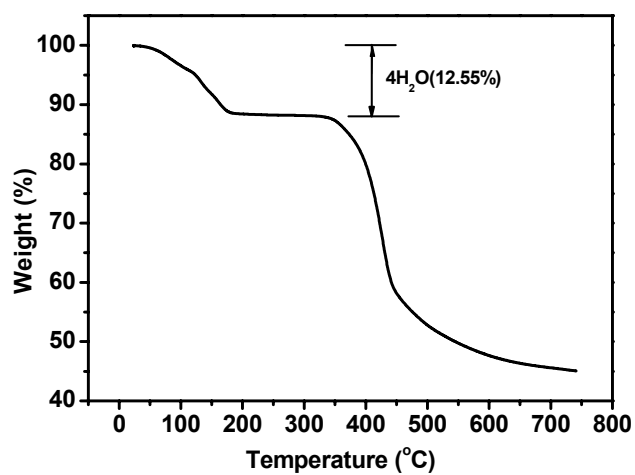

(a)

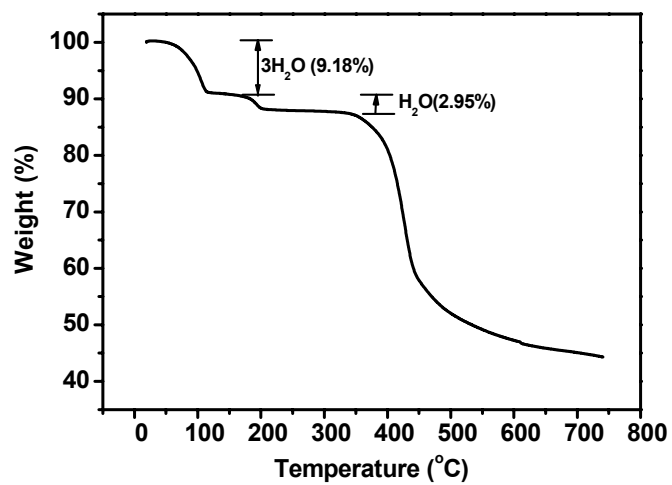

(b)

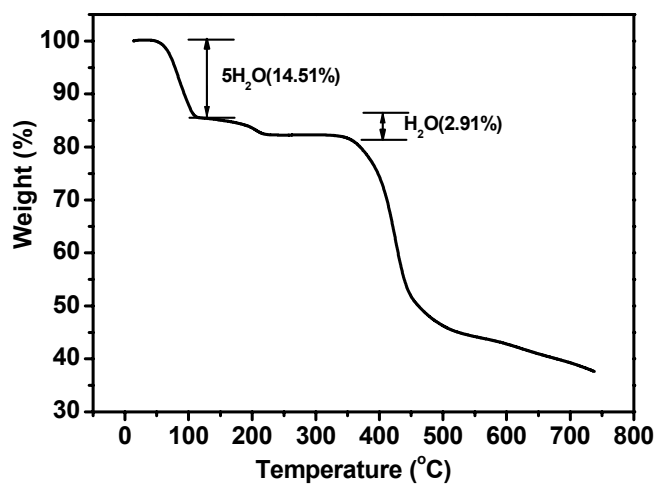

(c)
